# Supplementary material
Source: MDPI journal article supplement (https://www.mdpi.com/2071-1050/15/1/872)
Supplement: s1 [file s1]

**Table S1.** Summary of literature review

| Factors that might influence intentions to use a technology and/or its determinants | Definition                                                                                            | Previous findings                                                                                                                                                                                                                                                                                                                | Relevant research question (RQ) or hypothesis (H) in this study |
|-------------------------------------------------------------------------------------|-------------------------------------------------------------------------------------------------------|----------------------------------------------------------------------------------------------------------------------------------------------------------------------------------------------------------------------------------------------------------------------------------------------------------------------------------|-----------------------------------------------------------------|
| Perceived usefulness                                                                | The extent to which people find a technology to be a facilitator of their work [19]                   | Positive relationships between perceived usefulness and intentions to use mHealth apps [23]                                                                                                                                                                                                                                      | H1<br>(PU → IU)                                                 |
| Perceived ease of use                                                               | The extent to which people think a technology is not a struggle to use [19]                           | Positive relationships between perceived ease of use and intentions to use mHealth apps [28]<br>A positive relationship between perceived ease of use and perceived usefulness [35–37]                                                                                                                                           | H2<br>(PEOU → IU)<br><br>H3<br>(PEOU → PU)                      |
| Parasocial interactions                                                             | A friendship in which media characters become imaginary friends with or guides to media users [47–49] | Positive relationships between parasocial interactions and intentions to use an eHealth technology [50]<br>Positive relationships between parasocial interactions and positive evaluations/satisfaction with subjects of parasocial interactions [57–58]                                                                         | H4<br>(PSI → IU)<br><br>H5<br>(PSI → PU)                        |
| Motives for depression-related digital technology use                               | Instrumental and/or ritualized needs for using specific media [38–40]                                 | Identification of health-related instrumental and ritualized motives for media use [41]<br>Identification of barriers to and facilitators of mental healthcare [43, 44, 46] for which people might use digital technologies<br>Positive relationships between specific motives for media use and parasocial interactions [59–62] | RQ1<br>(MDD)<br><br>RQ2<br>(MDD → PU)<br><br>RQ3<br>(MDD → PSI) |

*Note.* IU = Intentions to Use a Technology. MDD = Motives for Depression-Related Digital Technology Use. PEOU = Perceived Ease of Use. PSI = Parasocial Interactions. PU = Perceived Usefulness.

**Table S2.** Measurement items for TAM and UGT variables

| <b>TAM and UGT variables</b>                                                                                                     |
|----------------------------------------------------------------------------------------------------------------------------------|
| Perceived usefulness: 8 items from Davis's [19] study                                                                            |
| 1. MyMentalPocket is helpful to manage depression without feeling self-conscious.                                                |
| 2. MyMentalPocket helps manage depression, by making me feel listened to, understood, and cared for.                             |
| 3. MyMentalPocket is helpful to get information and advice I need to manage depression.                                          |
| 4. MyMentalPocket helps me get new points of view and feedback I need to manage depression.                                      |
| 5. MyMentalPocket is helpful to save my money and time spent on managing depression.                                             |
| 6. I would find MyMentalPocket useful for depression care.                                                                       |
| 7. I would find MyMentalPocket would improve my ability to manage depression.                                                    |
| 8. MyMentalPocket helps positively change my attitude toward depression management and treatment.                                |
| Perceived ease of use: 5 items from Davis's [19] study                                                                           |
| 1. Learning to use MyMentalPocket is easy for me.                                                                                |
| 2. Using MyMentalPocket is clear and understandable.                                                                             |
| 3. I think I can flexibly use MyMentalPocket.                                                                                    |
| 4. It is easy for me to become skillful at using MyMentalPocket.                                                                 |
| 5. I find MyMentalPocket to be easy to use.                                                                                      |
| Parasocial interactions: 9 items from Hatcher and Gillaspay [68], Rubin et al. [67], and Yeum et al.'s [69] studies              |
| 1. Pocky makes me feel comfortable, as if I am with friends.                                                                     |
| 2. I believe Pocky likes me.                                                                                                     |
| 3. Pocky and I collaborate on setting goals for depression management.                                                           |
| 4. Pocky and I respect each other.                                                                                               |
| 5. Pocky and I are working toward mutually agreed-upon goals for depression management.                                          |
| 6. I feel that Pocky appreciates me.                                                                                             |
| 7. Pocky and I agree on what is important for me to manage depression.                                                           |
| 8. I feel Pocky would care about me even when I do things that Pocky does not approve of.                                        |
| 9. Pocky and I have established a good understanding of the kind of changes that would be good for me.                           |
| Intentions to use MyMentlaPocket: 6 items from Furneaux and Wade [70], Oliveira et al. [71], and Venkatesh et al.'s [72] studies |
| 1. I intend to use MyMentalPocket in the future.                                                                                 |
| 2. I will use MyMentalPocket to manage depression.                                                                               |
| 3. I will often use MyMentalPocket.                                                                                              |
| 4. I will continuously use MyMentalPocket.                                                                                       |
| 5. I will replace the ways I use to manage depression with MyMentalPocket.                                                       |
| 6. I will recommend MyMentalPocket to other people.                                                                              |

**Table S3.** Motives for depression-related digital technology use

| When depressed, I would use a specific website or a smartphone app ...                              | Factor (motive) loading |       |       |       |
|-----------------------------------------------------------------------------------------------------|-------------------------|-------|-------|-------|
|                                                                                                     | 1                       | 2     | 3     | 4     |
| Motive 1: Communication and Emotional Support                                                       |                         |       |       |       |
| Because I need someone to talk to or be with                                                        | 0.80                    | 0.10  | 0.13  | 0.03  |
| Because I want to communicate                                                                       | 0.75                    | 0.11  | 0.07  | 0.09  |
| Because I want to feel listened to, understood, and cared for                                       | 0.73                    | 0.21  | 0.02  | 0.12  |
| Because I don't want to be alone                                                                    | 0.71                    | 0.12  | 0.06  | 0.10  |
| To talk about my problems                                                                           | 0.63                    | 0.09  | -0.21 | 0.09  |
| To find someone there (websites, smartphone apps) who can reassure me and help manage my depression | 0.62                    | 0.23  | 0.01  | 0.08  |
| Because I want someone there (websites, smartphone apps) to help my depression management           | 0.61                    | 0.31  | -0.08 | 0.06  |
| To express my depression                                                                            | 0.61                    | 0.21  | 0.11  | -0.00 |
| Motive 2: Information- and Guidance-Seeking                                                         |                         |       |       |       |
| To get information or advice to manage depression                                                   | 0.18                    | 0.86  | -0.12 | 0.04  |
| To get what I need to manage depression                                                             | 0.20                    | 0.83  | -0.12 | 0.02  |
| To get information on depression management for free                                                | 0.18                    | 0.80  | -0.15 | 0.02  |
| To easily get information to manage depression                                                      | 0.24                    | 0.74  | -0.01 | -0.00 |
| To get various points of view on depression management                                              | 0.06                    | 0.74  | 0.10  | -0.10 |
| To learn what I haven't tried yet to manage depression                                              | 0.19                    | 0.73  | 0.00  | 0.11  |
| Because I want to learn about and manage depression in entertaining ways                            | 0.06                    | 0.62  | 0.36  | -0.11 |
| Motive 3: Habitual Entertainment-Seeking                                                            |                         |       |       |       |
| Because it's fun to play around and check things out there (websites, smartphone apps)              | 0.04                    | 0.00  | 0.84  | 0.11  |
| To find something to occupy my time                                                                 | 0.02                    | -0.10 | 0.82  | 0.15  |
| To pass time when bored                                                                             | -0.01                   | -0.10 | 0.82  | 0.18  |
| To have fun                                                                                         | -0.06                   | 0.01  | 0.69  | 0.05  |
| Because it's just a habit                                                                           | 0.05                    | -0.14 | 0.62  | 0.24  |
| Because I can use it whenever I want                                                                | 0.09                    | 0.15  | 0.61  | 0.28  |
| Motive 4: Escape                                                                                    |                         |       |       |       |
| To get away from pressures and responsibilities                                                     | 0.16                    | 0.02  | 0.20  | 0.80  |
| To forget about school, work, or other things                                                       | 0.15                    | 0.02  | 0.39  | 0.76  |
| To get away from what I'm doing                                                                     | 0.05                    | -0.01 | 0.30  | 0.68  |
| Eigenvalue                                                                                          | 9.18                    | 5.79  | 2.90  | 1.59  |
| % Variance explained                                                                                | 25.49                   | 16.09 | 8.06  | 4.40  |
| <i>M</i>                                                                                            | 2.88                    | 3.52  | 3.05  | 3.45  |
| <i>SD</i>                                                                                           | 0.87                    | 0.84  | 0.98  | 1.01  |
| Cronbach's alpha                                                                                    | 0.87                    | 0.89  | 0.86  | 0.80  |

**Table S4.** Pearson product-moment correlations among the variables

| Variables | 1      | 2        | 3      | 4       | 5       | 6       | 7    | 8       | 9       | 10      | 11 |
|-----------|--------|----------|--------|---------|---------|---------|------|---------|---------|---------|----|
| 1. GEN    | —      |          |        |         |         |         |      |         |         |         |    |
| 2. AGE    | -0.09  | —        |        |         |         |         |      |         |         |         |    |
| 3. D      | 0.10   | 0.08     | —      |         |         |         |      |         |         |         |    |
| 4. CES    | -0.07  | -0.14*   | -0.12* | —       |         |         |      |         |         |         |    |
| 5. IGS    | 0.03   | -0.02    | -0.12  | 0.44*** | —       |         |      |         |         |         |    |
| 6. HES    | 0.02   | -0.04    | -0.01  | 0.06    | -0.04   | —       |      |         |         |         |    |
| 7. ESC    | -0.07  | -0.01    | 0.07   | 0.25*** | 0.06    | 0.52*** | —    |         |         |         |    |
| 8. PU     | 0.11   | -0.16**  | -0.08  | 0.17**  | 0.25*** | 0.11    | 0.07 | —       |         |         |    |
| 9. PEOU   | 0.15*  | -0.22*** | -0.08  | 0.01    | 0.08    | 0.05    | 0.08 | 0.43*** | —       |         |    |
| 10. PSI   | 0.19** | -0.21**  | -0.08  | 0.24*** | 0.22*** | 0.22*** | 0.11 | 0.71*** | 0.34*** | —       |    |
| 11. IU    | 0.16** | -0.15*   | 0.03   | 0.20**  | 0.21**  | 0.13*   | 0.10 | 0.73*** | 0.35*** | 0.76*** | —  |

*Note.* \* $p < 0.05$  (two-tailed). \*\* $p < 0.01$  (two-tailed). \*\*\* $p < 0.001$  (two-tailed). CES = Communication and Emotional Support Motive. D = Depression. ESC = Escape Motive. GEN = Gender. HES = Habitual Entertainment-Seeking Motive. IGS = Information- and Guidance-Seeking Motive. IU = Intentions to Use. PEOU = Perceived Ease of Use. PSI = Parasocial Interactions. PU = Perceived Usefulness.

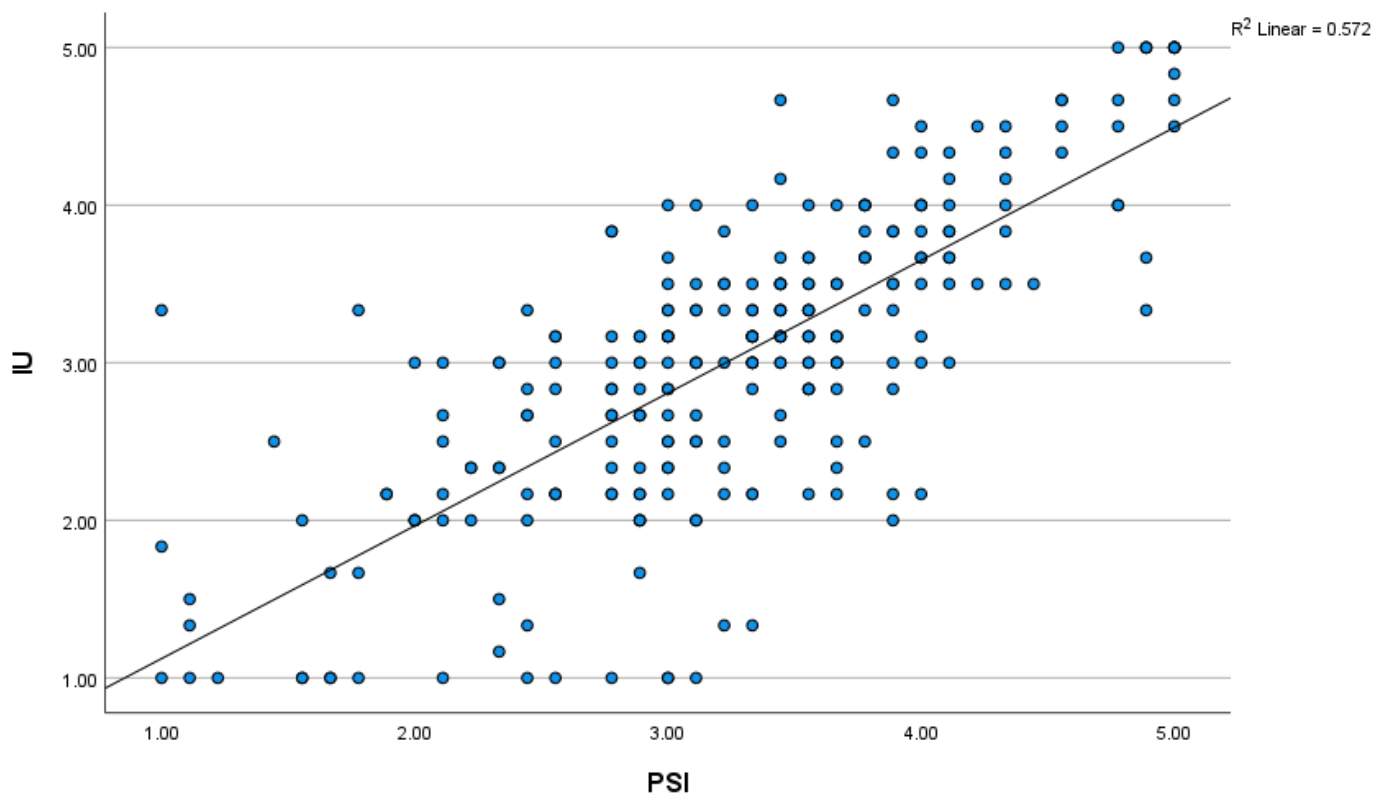

**Figure S1.** Bivariate relationship between parasocial interactions (PSI) and intentions to use (IU)

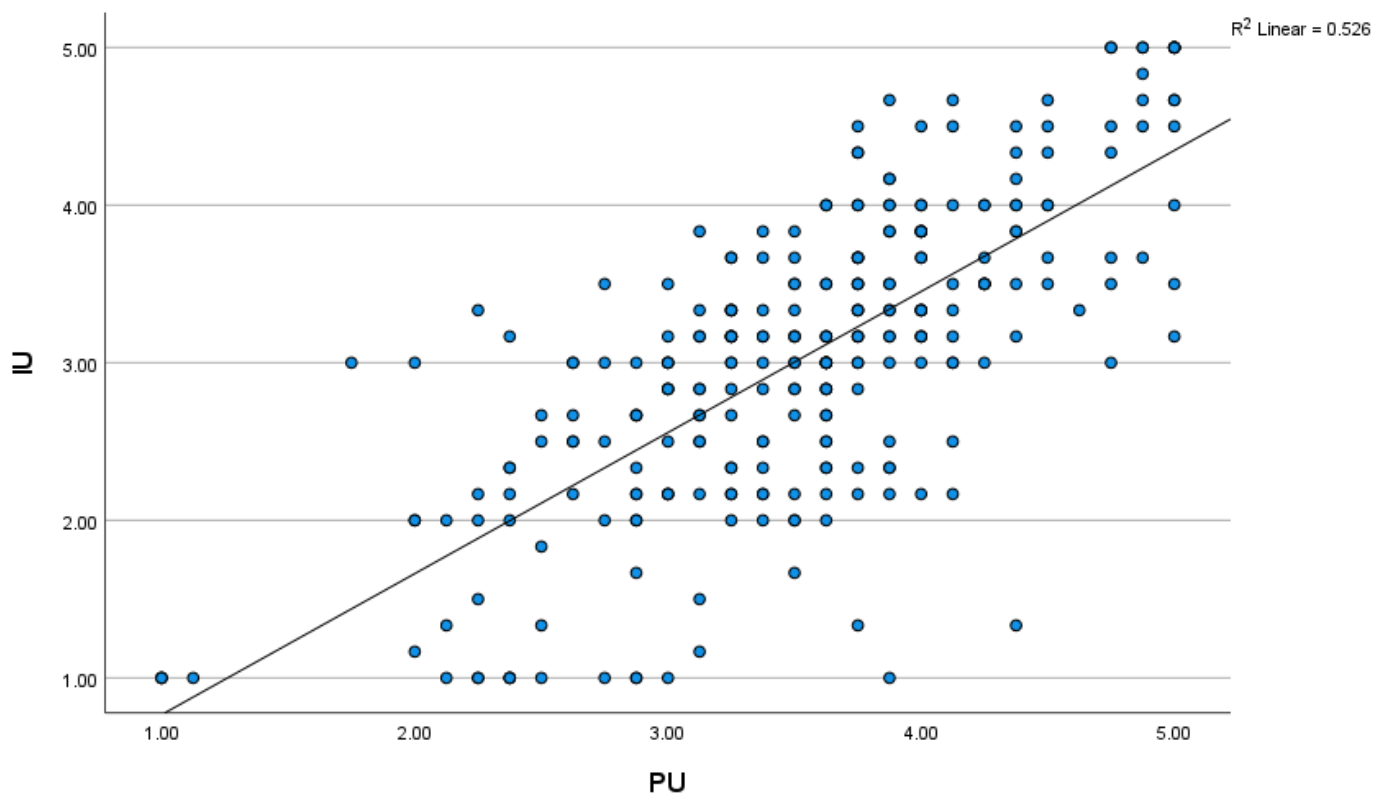

**Figure S2.** Bivariate relationship between perceived usefulness (PU) and intentions to use (IU)
